# Supplementary material for: A DNA Damage Response Gene Panel for Different Histologic Types of Epithelial Ovarian Carcinomas and Their Outcomes
Source: Biomedicines. 2021 Oct 3;9(10):1384. doi: 10.3390/biomedicines9101384 (PMC8533221; doi:10.3390/biomedicines9101384)
Supplement: Supplementary file 1 [file biomedicines-09-01384-s001.zip › OV NGS Table S1.pdf]

**Table S1: Variants of uncertain significance (VUS) with the potential of being deleterious mutations in all patients**

| <b>Gene</b>  | <b>Transcript</b> | <b>cDNA position</b> | <b>Amino acid</b> | <b>ESP6500</b> | <b>1000 Genomics</b> | <b>SIFT</b> | <b>Polyphen2</b> | <b>rs number</b> |
|--------------|-------------------|----------------------|-------------------|----------------|----------------------|-------------|------------------|------------------|
| <i>ATM</i>   | NM_000051         | c.C6934T             | p.L2312F          | NA             | NA                   | 0           | 1                | NA               |
| <i>ATM</i>   | NM_000051         | c.G2781T             | p.L927F           | NA             | NA                   | 0.01        | 1                | NA               |
| <i>ATM</i>   | NM_000051         | c.G902A              | p.G301D           | 0.000077       | NA                   | 0.002       | 0.999            | rs202208861      |
| <i>ATM</i>   | NM_000051         | c.G8608A             | p.D2870N          | NA             | NA                   | 0           | 1                | rs55798854       |
| <i>ATM</i>   | NM_000051         | c.A8450G             | p.Y2817C          | NA             | NA                   | 0.004       | 1                | rs747764678      |
| <i>BARD1</i> | NM_000465         | c.C1972T             | p.R658C           | 0.00592        | 0.005391             | 0.03        | 0.995            | rs3738888        |
| <i>BARD1</i> | NM_000465         | c.A1298G             | p.H433R           | NA             | NA                   | 0.01        | 0.992            | NA               |
| <i>BARD1</i> | NM_000465         | c.A1988G             | p.N663S           | NA             | 0.0002               | 0           | 1                | rs187590361      |
| <i>ERCC5</i> | NM_001204425      | c.C2518T             | p.R840W           | NA             | NA                   | 0.002       | 0.994            | rs758046666      |
| <i>ERCC5</i> | NM_001204425      | c.G4619A             | p.G1540E          | NA             | NA                   | 0           | 0.99             | NA               |
| <i>BRCA1</i> | NM_007294         | c.G1033T             | p.D345Y           | NA             | NA                   | 0.01        | 0.993            | rs80356961       |
| <i>BRCA1</i> | NM_007294         | c.C5501T             | p.T1834I          | NA             | NA                   | 0           | 0.999            | NA               |
| <i>BRCA1</i> | NM_007294         | c.C3448T             | p.P1150S          | NA             | 0.000799             | 0.01        | 1                | rs80357272       |
| <i>BRCA2</i> | NM_000059         | c.G7897T             | p.A2633S          | NA             | NA                   | 0.039       | 0.986            | rs431825359      |
| <i>BRCA2</i> | NM_000059         | c.A8602G             | p.K2868E          | NA             | NA                   | 0.001       | 0.998            | NA               |
| <i>BRCA2</i> | NM_000059         | c.C9872T             | p.S3291F          | NA             | NA                   | 0           | 1                | NA               |
| <i>BRIP1</i> | NM_032043         | c.A1G                | p.M1V             | NA             | NA                   | 0           | 0.982            | rs764585550      |
| <i>BRIP1</i> | NM_032043         | c.C2563T             | p.R855C           | 0.000154       | NA                   | 0.001       | 0.999            | rs146031731      |

|              |              |          |          |          |          |       |       |             |
|--------------|--------------|----------|----------|----------|----------|-------|-------|-------------|
| <b>CHEK2</b> | NM_007194    | c.C1561T | p.R521W  | NA       | 0.0002   | 0.002 | 1     | rs533475838 |
| <b>CHEK2</b> | NM_007194    | c.G1421A | p.R474H  | 0.000268 | NA       | 0     | 1     | rs121908706 |
| <b>CHEK2</b> | NM_007194    | c.G280A  | p.A94T   | NA       | NA       | 0.005 | 0.964 | rs753860983 |
| <b>ERCC2</b> | NM_000400    | c.A1256G | p.E419G  | NA       | NA       | 0     | 0.998 | rs775219805 |
| <b>ERCC3</b> | NM_000122    | c.G1468A | p.E490K  | 0.000077 | NA       | 0     | 0.994 | rs367552856 |
| <b>ERCC6</b> | NM_000124    | c.G1801A | p.G601S  | 0.000231 | 0.000599 | 0.007 | 1     | rs138758064 |
| <b>ERCC6</b> | NM_000124    | c.G385A  | p.V129M  | 0.000154 | 0.001398 | 0.003 | 0.002 | rs116360202 |
| <b>ERCC6</b> | NM_000124    | c.G1801A | p.G601S  | 0.000231 | 0.000599 | 0.007 | 1     | rs138758064 |
| <b>ERCC6</b> | NM_000124    | c.G230A  | p.R77Q   | NA       | NA       | 0.021 | 1     | NA          |
| <b>FANCA</b> | NM_000135    | c.C334G  | p.L112V  | NA       | NA       | 0     | 0.999 | NA          |
| <b>FANCA</b> | NM_000135    | c.C4225T | p.R1409W | 0.000077 | 0.0002   | 0.01  | 0.999 | rs139478274 |
| <b>FANCA</b> | NM_000135    | c.G538A  | p.E180K  | NA       | NA       | 0.004 | 0.991 | NA          |
| <b>FANCA</b> | NM_000135    | c.C4225T | p.R1409W | 0.000077 | 0.0002   | 0.005 | 0.999 | rs139478274 |
| <b>FANCA</b> | NM_000135    | c.G2923A | p.G975R  | 0.000077 | NA       | 0     | 1     | rs369565161 |
| <b>FANCA</b> | NM_000135    | c.C2525A | p.S842Y  | NA       | NA       | 0.001 | 1     | NA          |
| <b>FANCC</b> | NM_000136    | c.C1000T | p.R334W  | 0.000077 | NA       | 0.002 | 0.99  | rs140348260 |
| <b>FANCI</b> | NM_001113378 | c.C1261T | p.L421F  | NA       | NA       | 0.005 | 1     | NA          |
| <b>FANCI</b> | NM_001113378 | c.G1741A | p.E581K  | NA       | NA       | 0.009 | 0.998 | rs768875486 |
| <b>FANCM</b> | NM_020937    | c.G5026A | p.E1676K | NA       | NA       | 0.01  | 1     | NA          |
| <b>FANCM</b> | NM_020937    | c.C2996T | p.P999L  | 0.000692 | 0.000799 | 0     | 1     | rs148304968 |
| <b>FANCM</b> | NM_020937    | c.A2852G | p.D951G  | NA       | NA       | 0.007 | 0.958 | rs760309916 |
| <b>MLH3</b>  | NM_001040108 | c.G890A  | p.R297Q  | 0.000077 | NA       | 0.03  | 1     | rs374212925 |

|              |              |          |          |          |          |       |       |              |
|--------------|--------------|----------|----------|----------|----------|-------|-------|--------------|
| <i>MRE11</i> | NM_005590    | c.G1724A | p.G575D  | NA       | NA       | 0.015 | 0.989 | rs376555330  |
| <i>MSH2</i>  | NM_000251    | c.G232A  | p.V78I   | NA       | NA       | 0.03  | 0.998 | NA           |
| <i>MSH2</i>  | NM_000251    | c.G2197A | p.A733T  | NA       | NA       | 0     | 0.995 | NA           |
| <i>MSH2</i>  | NM_000251    | c.G1601T | p.R534L  | NA       | NA       | 0     | 1     | NA           |
| <i>MSH3</i>  | NM_002439    | c.G2913C | p.L971F  | NA       | NA       | 0     | 1     | rs775386491  |
| <i>MSH3</i>  | NM_002439    | c.G2913C | p.L971F  | NA       | NA       | 0     | 1     | rs775386491  |
| <i>MSH3</i>  | NM_002439    | c.C2335T | p.R779C  | 0.000154 | NA       | 0     | 1     | rs368162490  |
| <i>MSH3</i>  | NM_002439    | c.G1366A | p.E456K  | NA       | NA       | 0.001 | 1     | rs963234468  |
| <i>MSH6</i>  | NM_001281492 | c.C2870A | p.P957H  | 0.000154 | NA       | 0     | 0.998 | rs63750753   |
| <i>MSH6</i>  | NM_001281492 | c.C3266T | p.T1089I | NA       | NA       | 0     | 1     | rs63750949   |
| <i>MSH6</i>  | NM_001281492 | c.C1910G | p.T637S  | NA       | NA       | 0.009 | 0.995 | rs587781462  |
| <i>MSH6</i>  | NM_001281492 | c.C1910G | p.T637S  | NA       | NA       | 0.009 | 0.995 | rs587781462  |
| <i>PALB2</i> | NM_024675    | c.C109T  | p.R37C   | NA       | NA       | 0     | 1     | rs200048921  |
| <i>PALB2</i> | NM_024675    | c.G3054C | p.E1018D | NA       | 0.000799 | 0.02  | 0.998 | rs183489969  |
| <i>PMS1</i>  | NM_000534    | c.C287G  | p.A96G   | NA       | NA       | 0     | 0.998 | rs139414606  |
| <i>PMS2</i>  | NM_000535    | c.C883T  | p.R295W  | NA       | 0.0002   | 0.001 | 1     | rs182246929  |
| <i>PMS2</i>  | NM_000535    | c.C883T  | p.R295W  | NA       | 0.0002   | 0.001 | 1     | rs182246929  |
| <i>POLD1</i> | NM_002691    | c.A2602T | p.I868F  | NA       | NA       | 0     | 0.999 | NA           |
| <i>POLD1</i> | NM_002691    | c.G2275A | p.V759I  | 0.001307 | 0.000998 | 0     | 1     | rs145473716  |
| <i>POLD1</i> | NM_002691    | c.G2758A | p.D920N  | NA       | NA       | 0.001 | 0.974 | rs1060501811 |
| <i>POLE</i>  | NM_006231    | c.G2503A | p.V835I  | NA       | NA       | 0.01  | 1     | NA           |
| <i>POLE</i>  | NM_006231    | c.G3176A | p.R1059H | NA       | NA       | 0     | 1     | rs751425952  |

|                     |                  |                 |                 |                 |                 |              |              |                     |
|---------------------|------------------|-----------------|-----------------|-----------------|-----------------|--------------|--------------|---------------------|
| <b><i>POLE</i></b>  | <b>NM_006231</b> | <b>c.C833T</b>  | <b>p.T278M</b>  | <b>NA</b>       | <b>NA</b>       | <b>0.001</b> | <b>1</b>     | <b>rs764254754</b>  |
| <b><i>POLE</i></b>  | <b>NM_006231</b> | <b>c.A712T</b>  | <b>p.I238F</b>  | <b>NA</b>       | <b>0.0002</b>   | <b>0.001</b> | <b>1</b>     | <b>rs536684123</b>  |
| <b><i>POLE</i></b>  | <b>NM_006231</b> | <b>c.C857G</b>  | <b>p.P286R</b>  | <b>NA</b>       | <b>NA</b>       | <b>0</b>     | <b>1</b>     | <b>rs1057519943</b> |
| <b><i>POLH</i></b>  | <b>NM_006502</b> | <b>c.C1433T</b> | <b>p.T478M</b>  | <b>0.000077</b> | <b>0.005791</b> | <b>0.015</b> | <b>0.996</b> | <b>rs9296419</b>    |
| <b><i>POLH</i></b>  | <b>NM_006502</b> | <b>c.A40G</b>   | <b>p.M14V</b>   | <b>NA</b>       | <b>0.0002</b>   | <b>0</b>     | <b>1</b>     | <b>rs61748656</b>   |
| <b><i>POLH</i></b>  | <b>NM_006502</b> | <b>c.C1433T</b> | <b>p.T478M</b>  | <b>0.000077</b> | <b>0.005791</b> | <b>0.015</b> | <b>0.996</b> | <b>rs9296419</b>    |
| <b><i>POLH</i></b>  | <b>NM_006502</b> | <b>c.C1433T</b> | <b>p.T478M</b>  | <b>0.000077</b> | <b>0.005791</b> | <b>0.015</b> | <b>0.996</b> | <b>rs9296419</b>    |
| <b><i>POLH</i></b>  | <b>NM_006502</b> | <b>c.C1433T</b> | <b>p.T478M</b>  | <b>0.000077</b> | <b>0.005791</b> | <b>0.015</b> | <b>0.996</b> | <b>rs9296419</b>    |
| <b><i>POLH</i></b>  | <b>NM_006502</b> | <b>c.G246T</b>  | <b>p.E82D</b>   | <b>NA</b>       | <b>0.0002</b>   | <b>0.024</b> | <b>0.999</b> | <b>rs77759052</b>   |
| <b><i>POLK</i></b>  | <b>NM_016218</b> | <b>c.C1048G</b> | <b>p.P350A</b>  | <b>NA</b>       | <b>0.000599</b> | <b>0.04</b>  | <b>1</b>     | <b>NA</b>           |
| <b><i>POLK</i></b>  | <b>NM_016218</b> | <b>c.A454G</b>  | <b>p.M152V</b>  | <b>NA</b>       | <b>NA</b>       | <b>0</b>     | <b>0.999</b> | <b>NA</b>           |
| <b><i>POLK</i></b>  | <b>NM_016218</b> | <b>c.C1048G</b> | <b>p.P350A</b>  | <b>NA</b>       | <b>0.000599</b> | <b>0</b>     | <b>0.998</b> | <b>rs528839357</b>  |
| <b><i>POLK</i></b>  | <b>NM_016218</b> | <b>c.C1048G</b> | <b>p.P350A</b>  | <b>NA</b>       | <b>0.000599</b> | <b>0</b>     | <b>0.998</b> | <b>rs528839357</b>  |
| <b><i>POLK</i></b>  | <b>NM_016218</b> | <b>c.C892T</b>  | <b>p.R298C</b>  | <b>NA</b>       | <b>NA</b>       | <b>0</b>     | <b>1</b>     | <b>rs200548318</b>  |
| <b><i>POLK</i></b>  | <b>NM_016218</b> | <b>c.C1406T</b> | <b>p.T469I</b>  | <b>NA</b>       | <b>NA</b>       | <b>0.004</b> | <b>0.999</b> | <b>NA</b>           |
| <b><i>RAD50</i></b> | <b>NM_005732</b> | <b>c.C3790T</b> | <b>p.L1264F</b> | <b>NA</b>       | <b>0.000399</b> | <b>0</b>     | <b>1</b>     | <b>rs199579239</b>  |
| <b><i>SLX4</i></b>  | <b>NM_032444</b> | <b>c.C1271T</b> | <b>p.A424V</b>  | <b>NA</b>       | <b>0.0002</b>   | <b>0</b>     | <b>1</b>     | <b>NA</b>           |
| <b><i>SLX4</i></b>  | <b>NM_032444</b> | <b>c.G2449C</b> | <b>p.E817Q</b>  | <b>0.000077</b> | <b>0.0002</b>   | <b>0.03</b>  | <b>0.999</b> | <b>rs143730668</b>  |
| <b><i>SLX4</i></b>  | <b>NM_032444</b> | <b>c.C4765T</b> | <b>p.R1589C</b> | <b>NA</b>       | <b>0.000799</b> | <b>0</b>     | <b>1</b>     | <b>rs181782315</b>  |
| <b><i>SLX4</i></b>  | <b>NM_032444</b> | <b>c.C1271T</b> | <b>p.A424V</b>  | <b>NA</b>       | <b>0.0002</b>   | <b>0</b>     | <b>1</b>     | <b>NA</b>           |
| <b><i>SLX4</i></b>  | <b>NM_032444</b> | <b>c.G2449C</b> | <b>p.E817Q</b>  | <b>0.000077</b> | <b>0.0002</b>   | <b>0.03</b>  | <b>0.999</b> | <b>rs143730668</b>  |
| <b><i>SLX4</i></b>  | <b>NM_032444</b> | <b>c.C5383T</b> | <b>p.R1795C</b> | <b>NA</b>       | <b>NA</b>       | <b>0.004</b> | <b>0.98</b>  | <b>rs762619200</b>  |

|             |           |          |          |    |    |       |       |              |
|-------------|-----------|----------|----------|----|----|-------|-------|--------------|
| <i>SLX4</i> | NM_032444 | c.C5156A | p.S1719Y | NA | NA | 0.001 | 1     | NA           |
| <i>TP53</i> | NM_000546 | c.A707G  | p.Y236C  | NA | NA | 0     | 1     | NA           |
| <i>TP53</i> | NM_000546 | c.G713A  | p.C238Y  | NA | NA | 0     | 1     | NA           |
| <i>TP53</i> | NM_000546 | c.G469T  | p.V157F  | NA | NA | 0.01  | 1     | rs121912654  |
| <i>TP53</i> | NM_000546 | c.A536G  | p.H179R  | NA | NA | 0     | 1     | NA           |
| <i>TP53</i> | NM_000546 | c.C726G  | p.C242W  | NA | NA | 0     | 1     | NA           |
| <i>TP53</i> | NM_000546 | c.A757C  | p.T253P  | NA | NA | 0     | 1     | NA           |
| <i>TP53</i> | NM_000546 | c.A838G  | p.R280G  | NA | NA | 0     | 1     | NA           |
| <i>TP53</i> | NM_000546 | c.C535A  | p.H179N  | NA | NA | 0     | 1     | NA           |
| <i>TP53</i> | NM_000546 | c.T810G  | p.F270L  | NA | NA | 0     | 1     | NA           |
| <i>TP53</i> | NM_000546 | c.A578G  | p.H193R  | NA | NA | 0.01  | 1     | NA           |
| <i>TP53</i> | NM_000546 | c.A578T  | p.H193L  | NA | NA | 0     | 1     | NA           |
| <i>TP53</i> | NM_000546 | c.A659G  | p.Y220C  | NA | NA | 0     | 1     | NA           |
| <i>TP53</i> | NM_000546 | c.G796A  | p.G266R  | NA | NA | 0     | 1     | NA           |
| <i>TP53</i> | NM_000546 | c.C586G  | p.R196G  | NA | NA | 0     | 1     | NA           |
| <i>TP53</i> | NM_000546 | c.A631G  | p.T211A  | NA | NA | 0     | 0.978 | NA           |
| <i>TP53</i> | NM_000546 | c.A707G  | p.Y236C  | NA | NA | 0     | 1     | NA           |
| <i>TP53</i> | NM_000546 | c.T584C  | p.I195T  | NA | NA | 0     | 1     | NA           |
| <i>TP53</i> | NM_000546 | c.A740T  | p.N247I  | NA | NA | 0     | 1     | NA           |
| <i>TP53</i> | NM_000546 | c.A578G  | p.H193R  | NA | NA | 0.01  | 1     | NA           |
| <i>TP53</i> | NM_000546 | c.A536G  | p.H179R  | NA | NA | 0     | 0.989 | rs1057519991 |
| <i>TP53</i> | NM_000546 | c.T470A  | p.V157D  | NA | NA | 0     | 1     | NA           |

|                     |                  |                |                |           |                 |              |              |                    |
|---------------------|------------------|----------------|----------------|-----------|-----------------|--------------|--------------|--------------------|
| <i><b>XPA</b></i>   | <b>NM_000380</b> | <b>c.C772T</b> | <b>p.R258C</b> | <b>NA</b> | <b>0.000399</b> | <b>0.03</b>  | <b>0.983</b> | <b>rs188860873</b> |
| <i><b>XPC</b></i>   | <b>NM_004628</b> | <b>c.C586T</b> | <b>p.R196C</b> | <b>NA</b> | <b>NA</b>       | <b>0.001</b> | <b>1</b>     | <b>NA</b>          |
| <i><b>XRCC3</b></i> | <b>NM_005432</b> | <b>c.G662A</b> | <b>p.C221Y</b> | <b>NA</b> | <b>0.0002</b>   | <b>0.023</b> | <b>0.99</b>  | <b>rs201886982</b> |
