# Supplementary material for: A DNA Damage Response Gene Panel for Different Histologic Types of Epithelial Ovarian Carcinomas and Their Outcomes
Source: Biomedicines. 2021 Oct 3;9(10):1384. doi: 10.3390/biomedicines9101384 (PMC8533221; doi:10.3390/biomedicines9101384)
Supplement: Supplementary file 1 [file biomedicines-09-01384-s001.zip › OV NGS Table S2.pdf]

**Table S2-1: The percentages of DDR genes mutations in all patients**

| <b>Histology</b>     | <b>ALL</b> | <b>Serous carcinoma</b> | <b>Endometrioid carcinoma</b> | <b>Clear cell carcinoma</b> |
|----------------------|------------|-------------------------|-------------------------------|-----------------------------|
| <b>Wild type</b>     | 54.70%     | 30.40%                  | 66.70%                        | 73.40%                      |
| <b><i>BARD1</i></b>  | 0.6%       | 0.0%                    | 0.0%                          | 1.6%                        |
| <b><i>BRCA1</i></b>  | 1.2%       | 1.4%                    | 0.0%                          | 1.6%                        |
| <b><i>BRCA2</i></b>  | 4.1%       | 5.8%                    | 2.6%                          | 3.1%                        |
| <b><i>BRIP1</i></b>  | 0.6%       | 1.4%                    | 0.0%                          | 0.0%                        |
| <b><i>FANCC</i></b>  | 0.6%       | 0.0%                    | 2.6%                          | 0.0%                        |
| <b><i>FANCG</i></b>  | 0.6%       | 1.4%                    | 0.0%                          | 0.0%                        |
| <b><i>FANCI</i></b>  | 0.6%       | 0.0%                    | 0.0%                          | 1.6%                        |
| <b><i>FANCM</i></b>  | 0.6%       | 0.0%                    | 2.6%                          | 0.0%                        |
| <b><i>MRE11</i></b>  | 0.6%       | 0.0%                    | 2.6%                          | 0.0%                        |
| <b><i>RAD50</i></b>  | 1.7%       | 0.0%                    | 5.1%                          | 1.6%                        |
| <b><i>RAD51C</i></b> | 2.3%       | 5.8%                    | 0.0%                          | 0.0%                        |
| <b><i>RAD51D</i></b> | 0.6%       | 1.4%                    | 0.0%                          | 0.0%                        |
| <b><i>MLH1</i></b>   | 1.2%       | 0.0%                    | 2.6%                          | 1.6%                        |
| <b><i>MLH3</i></b>   | 2.3%       | 1.4%                    | 5.1%                          | 1.6%                        |
| <b><i>MSH2</i></b>   | 1.7%       | 0.0%                    | 7.7%                          | 0.0%                        |
| <b><i>MSH3</i></b>   | 0.6%       | 0.0%                    | 2.6%                          | 0.0%                        |
| <b><i>MSH6</i></b>   | 1.7%       | 1.4%                    | 2.6%                          | 1.6%                        |
| <b><i>MUTYH</i></b>  | 6.4%       | 4.3%                    | 5.1%                          | 9.4%                        |
| <b><i>OGG1</i></b>   | 0.6%       | 1.4%                    | 0.0%                          | 0.0%                        |
| <b><i>XRCC4</i></b>  | 0.6%       | 0.0%                    | 0.0%                          | 1.6%                        |
| <b><i>XRCC6</i></b>  | 0.6%       | 1.4%                    | 0.0%                          | 0.0%                        |
| <b><i>ERCC8</i></b>  | 2.9%       | 4.3%                    | 0.0%                          | 3.1%                        |
| <b><i>POLD1</i></b>  | 0.6%       | 0.0%                    | 0.0%                          | 1.6%                        |
| <b><i>ATM</i></b>    | 3.5%       | 1.4%                    | 12.8%                         | 0.0%                        |
| <b><i>CHEK2</i></b>  | 0.6%       | 0.0%                    | 0.0%                          | 1.6%                        |
| <b><i>TP53</i></b>   | 27.9%      | 56.5%                   | 15.4%                         | 4.7%                        |

**Table S2-2: The percentages of DDR genes mutations by subgroups**

| <b>Histology</b> | <b>ALL</b> | <b>Serous carcinoma</b> | <b>Endometrioid carcinoma</b> | <b>Clear cell carcinoma</b> |
|------------------|------------|-------------------------|-------------------------------|-----------------------------|
| <b>Wild type</b> | 54.70%     | 30.40%                  | 66.70%                        | 73.40%                      |
| <b>HR</b>        | 10.5%      | 15.9%                   | 7.7%                          | 6.3%                        |
| <b>NHEJ</b>      | 1.2%       | 1.4%                    | 0.0%                          | 1.6%                        |
| <b>MMR</b>       | 6.4%       | 2.9%                    | 15.4%                         | 4.7%                        |
| <b>BER</b>       | 7.0%       | 5.8%                    | 5.1%                          | 9.4%                        |
| <b>NER</b>       | 2.9%       | 4.3%                    | 0.0%                          | 3.1%                        |
| <b>TLS</b>       | 0.6%       | 0.0%                    | 0.0%                          | 1.6%                        |
| <b>CCR</b>       | 30.8%      | 58.0%                   | 23.1%                         | 6.3%                        |
| <b>DDR</b>       | 45.3%      | 69.6%                   | 33.3%                         | 26.6%                       |
