# Supplementary material for: A DNA Damage Response Gene Panel for Different Histologic Types of Epithelial Ovarian Carcinomas and Their Outcomes
Source: Biomedicines. 2021 Oct 3;9(10):1384. doi: 10.3390/biomedicines9101384 (PMC8533221; doi:10.3390/biomedicines9101384)
Supplement: Supplementary file 1 [file biomedicines-09-01384-s001.zip › OV NGS Table S3.pdf]

**Table S3. The percentages of subgroups of DDR gene mutations by clinical factors in the patients**

| Genes     | Histology |       |        | FIGO stage |          | Tumor grade |        | Recurrence |        | Death |        |       |
|-----------|-----------|-------|--------|------------|----------|-------------|--------|------------|--------|-------|--------|-------|
|           | OSA       | OEA   | OCCA   | Early      | Advanced | Low         | High   | No         | Yes    | No    | Yes    |       |
| 172       | 69        | 39    | 64     | 69         | 103      | 29          | 143    | 70         | 102    | 96    | 76     |       |
| HR        |           |       |        |            |          |             |        |            |        |       |        |       |
| Wild type | 154       | 58    | 36     | 60         | 64       | 90          | 26     | 128        | 64     | 90    | 89     | 65    |
|           | 89.5%     | 84.1% | 92.3%  | 93.8%      | 92.8%    | 87.4%       | 89.7%  | 89.5%      | 91.4%  | 88.2% | 92.7%  | 85.5% |
| Mutation  | 18        | 11    | 3      | 4          | 5        | 13          | 3      | 15         | 6      | 12    | 7      | 11    |
|           | 10.5%     | 15.9% | 7.7%   | 6.3%       | 7.2%     | 12.6%       | 10.3%  | 10.5%      | 8.6%   | 11.8% | 7.3%   | 14.5% |
| P value*  |           |       |        | 0.154      |          | 0.259       |        | 0.981      |        | 0.502 |        | 0.126 |
| NHEJ      |           |       |        |            |          |             |        |            |        |       |        |       |
| Wild type | 170       | 68    | 39     | 63         | 69       | 101         | 29     | 141        | 70     | 100   | 96     | 74    |
|           | 98.8%     | 98.6% | 100.0% | 98.4%      | 100.0%   | 98.1%       | 100.0% | 98.6%      | 100.0% | 98.0% | 100.0% | 97.4% |
| Mutation  | 2         | 1     | 0      | 1          | 0        | 2           | 0      | 2          | 0      | 2     | 0      | 2     |
|           | 1.2%      | 1.4%  | 0.0%   | 1.6%       | 0.0%     | 1.9%        | 0.0%   | 1.4%       | 0.0%   | 2.0%  | 0.0%   | 2.6%  |
| P value*  |           |       |        | 0.742      |          | 0.244       |        | 0.522      |        | 0.239 |        | 0.11  |
| MMR       |           |       |        |            |          |             |        |            |        |       |        |       |
| Wild type | 161       | 67    | 33     | 61         | 65       | 96          | 24     | 137        | 66     | 95    | 91     | 70    |
|           | 93.6%     | 97.1% | 84.6%  | 95.3%      | 94.2%    | 93.2%       | 82.8%  | 95.8%      | 94.3%  | 93.1% | 94.8%  | 92.1% |
| Mutation  | 11        | 2     | 6      | 3          | 4        | 7           | 5      | 6          | 4      | 7     | 5      | 6     |
|           | 6.4%      | 2.9%  | 15.4%  | 4.7%       | 5.8%     | 6.8%        | 17.2%  | 4.2%       | 5.7%   | 6.9%  | 5.2%   | 7.9%  |

|                  |       |        |        |       |        |       |        |       |        |       |        |       |       |
|------------------|-------|--------|--------|-------|--------|-------|--------|-------|--------|-------|--------|-------|-------|
| <b>P value*</b>  |       | 0.03   |        |       | 0.793  |       |        | 0.009 |        |       | 0.762  |       | 0.475 |
| <b>BER</b>       |       |        |        |       |        |       |        |       |        |       |        |       |       |
| <b>Wild type</b> | 160   | 65     | 37     | 58    | 65     | 95    | 27     | 133   | 66     | 94    | 91     | 69    |       |
|                  | 93.0% | 94.2%  | 94.9%  | 90.6% | 94.2%  | 92.2% | 93.1%  | 93.0% | 94.3%  | 92.2% | 94.8%  | 90.8% |       |
| <b>Mutation</b>  | 12    | 4      | 2      | 6     | 4      | 8     | 2      | 10    | 4      | 8     | 5      | 7     |       |
|                  | 7.0%  | 5.8%   | 5.1%   | 9.4%  | 5.8%   | 7.8%  | 6.9%   | 7.0%  | 5.7%   | 7.8%  | 5.2%   | 9.2%  |       |
| <b>P value*</b>  |       | 0.631  |        |       | 0.619  |       |        | 0.985 |        |       | 0.59   |       | 0.306 |
| <b>NER</b>       |       |        |        |       |        |       |        |       |        |       |        |       |       |
| <b>Wild type</b> | 167   | 66     | 39     | 62    | 67     | 100   | 29     | 138   | 67     | 100   | 93     | 74    |       |
|                  | 97.1% | 95.7%  | 100.0% | 96.9% | 97.1%  | 97.1% | 100.0% | 96.5% | 95.7%  | 98.0% | 96.9%  | 97.4% |       |
| <b>Mutation</b>  | 5     | 3      | 0      | 2     | 2      | 3     | 0      | 5     | 3      | 2     | 3      | 2     |       |
|                  | 2.9%  | 4.3%   | 0.0%   | 3.1%  | 2.9%   | 2.9%  | 0.0%   | 3.5%  | 4.3%   | 2.0%  | 3.1%   | 2.6%  |       |
| <b>P value*</b>  |       | 0.43   |        |       | 0.996  |       |        | 0.307 |        |       | 0.373  |       | 0.848 |
| <b>TLS</b>       |       |        |        |       |        |       |        |       |        |       |        |       |       |
| <b>Wild type</b> | 171   | 69     | 39     | 63    | 69     | 102   | 29     | 142   | 70     | 101   | 96     | 75    |       |
|                  | 99.4% | 100.0% | 100.0% | 98.4% | 100.0% | 99.0% | 100.0% | 99.3% | 100.0% | 99.0% | 100.0% | 98.7% |       |
| <b>Mutation</b>  | 1     | 0      | 0      | 1     | 0      | 1     | 0      | 1     | 0      | 1     | 0      | 1     |       |
|                  | 0.6%  | 0.0%   | 0.0%   | 1.6%  | 0.0%   | 1.0%  | 0.0%   | 0.7%  | 0.0%   | 1.0%  | 0.0%   | 1.3%  |       |
| <b>P value*</b>  |       | 0.428  |        |       | 0.412  |       |        | 0.652 |        |       | 0.406  |       | 0.26  |
| <b>CCR</b>       |       |        |        |       |        |       |        |       |        |       |        |       |       |
| <b>Wild type</b> | 119   | 29     | 30     | 60    | 60     | 59    | 24     | 95    | 57     | 62    | 74     | 45    |       |
|                  | 69.2% | 42.0%  | 76.9%  | 93.8% | 87.0%  | 57.3% | 82.8%  | 66.4% | 81.4%  | 60.8% | 77.1%  | 59.2% |       |

|                 |       |       |       |        |       |        |       |       |       |       |       |       |
|-----------------|-------|-------|-------|--------|-------|--------|-------|-------|-------|-------|-------|-------|
| <b>Mutation</b> | 53    | 40    | 9     | 4      | 9     | 44     | 5     | 48    | 13    | 40    | 22    | 31    |
|                 | 30.8% | 58.0% | 23.1% | 6.3%   | 13.0% | 42.7%  | 17.2% | 33.6% | 18.6% | 39.2% | 22.9% | 40.8% |
| <b>P value*</b> |       |       |       | <0.001 |       | <0.001 |       | 0.083 |       | 0.004 |       | 0.012 |

*Note:* OSA: ovarian serous carcinoma; OEA: ovarian endometrioid carcinoma; OCCA: ovarian clear cell carcinoma; HR: homologous recombination; NHEJ: nonhomologous DNA end joining; MMR: mismatch repair; BER: base excision repair; NER: nucleotide excision repair; TLS: translesion synthesis; CCR: cell cycle regulation; \*Pearson's chi-squared test
